# Supplementary material for: Genome-wide association studies detects candidate genes for wool traits by re-sequencing in Chinese fine-wool sheep
Source: PubMed Central journal article supplement (PMC7893944; doi:10.1186/s12864-021-07399-3), 2021-02-18

# LD Decay

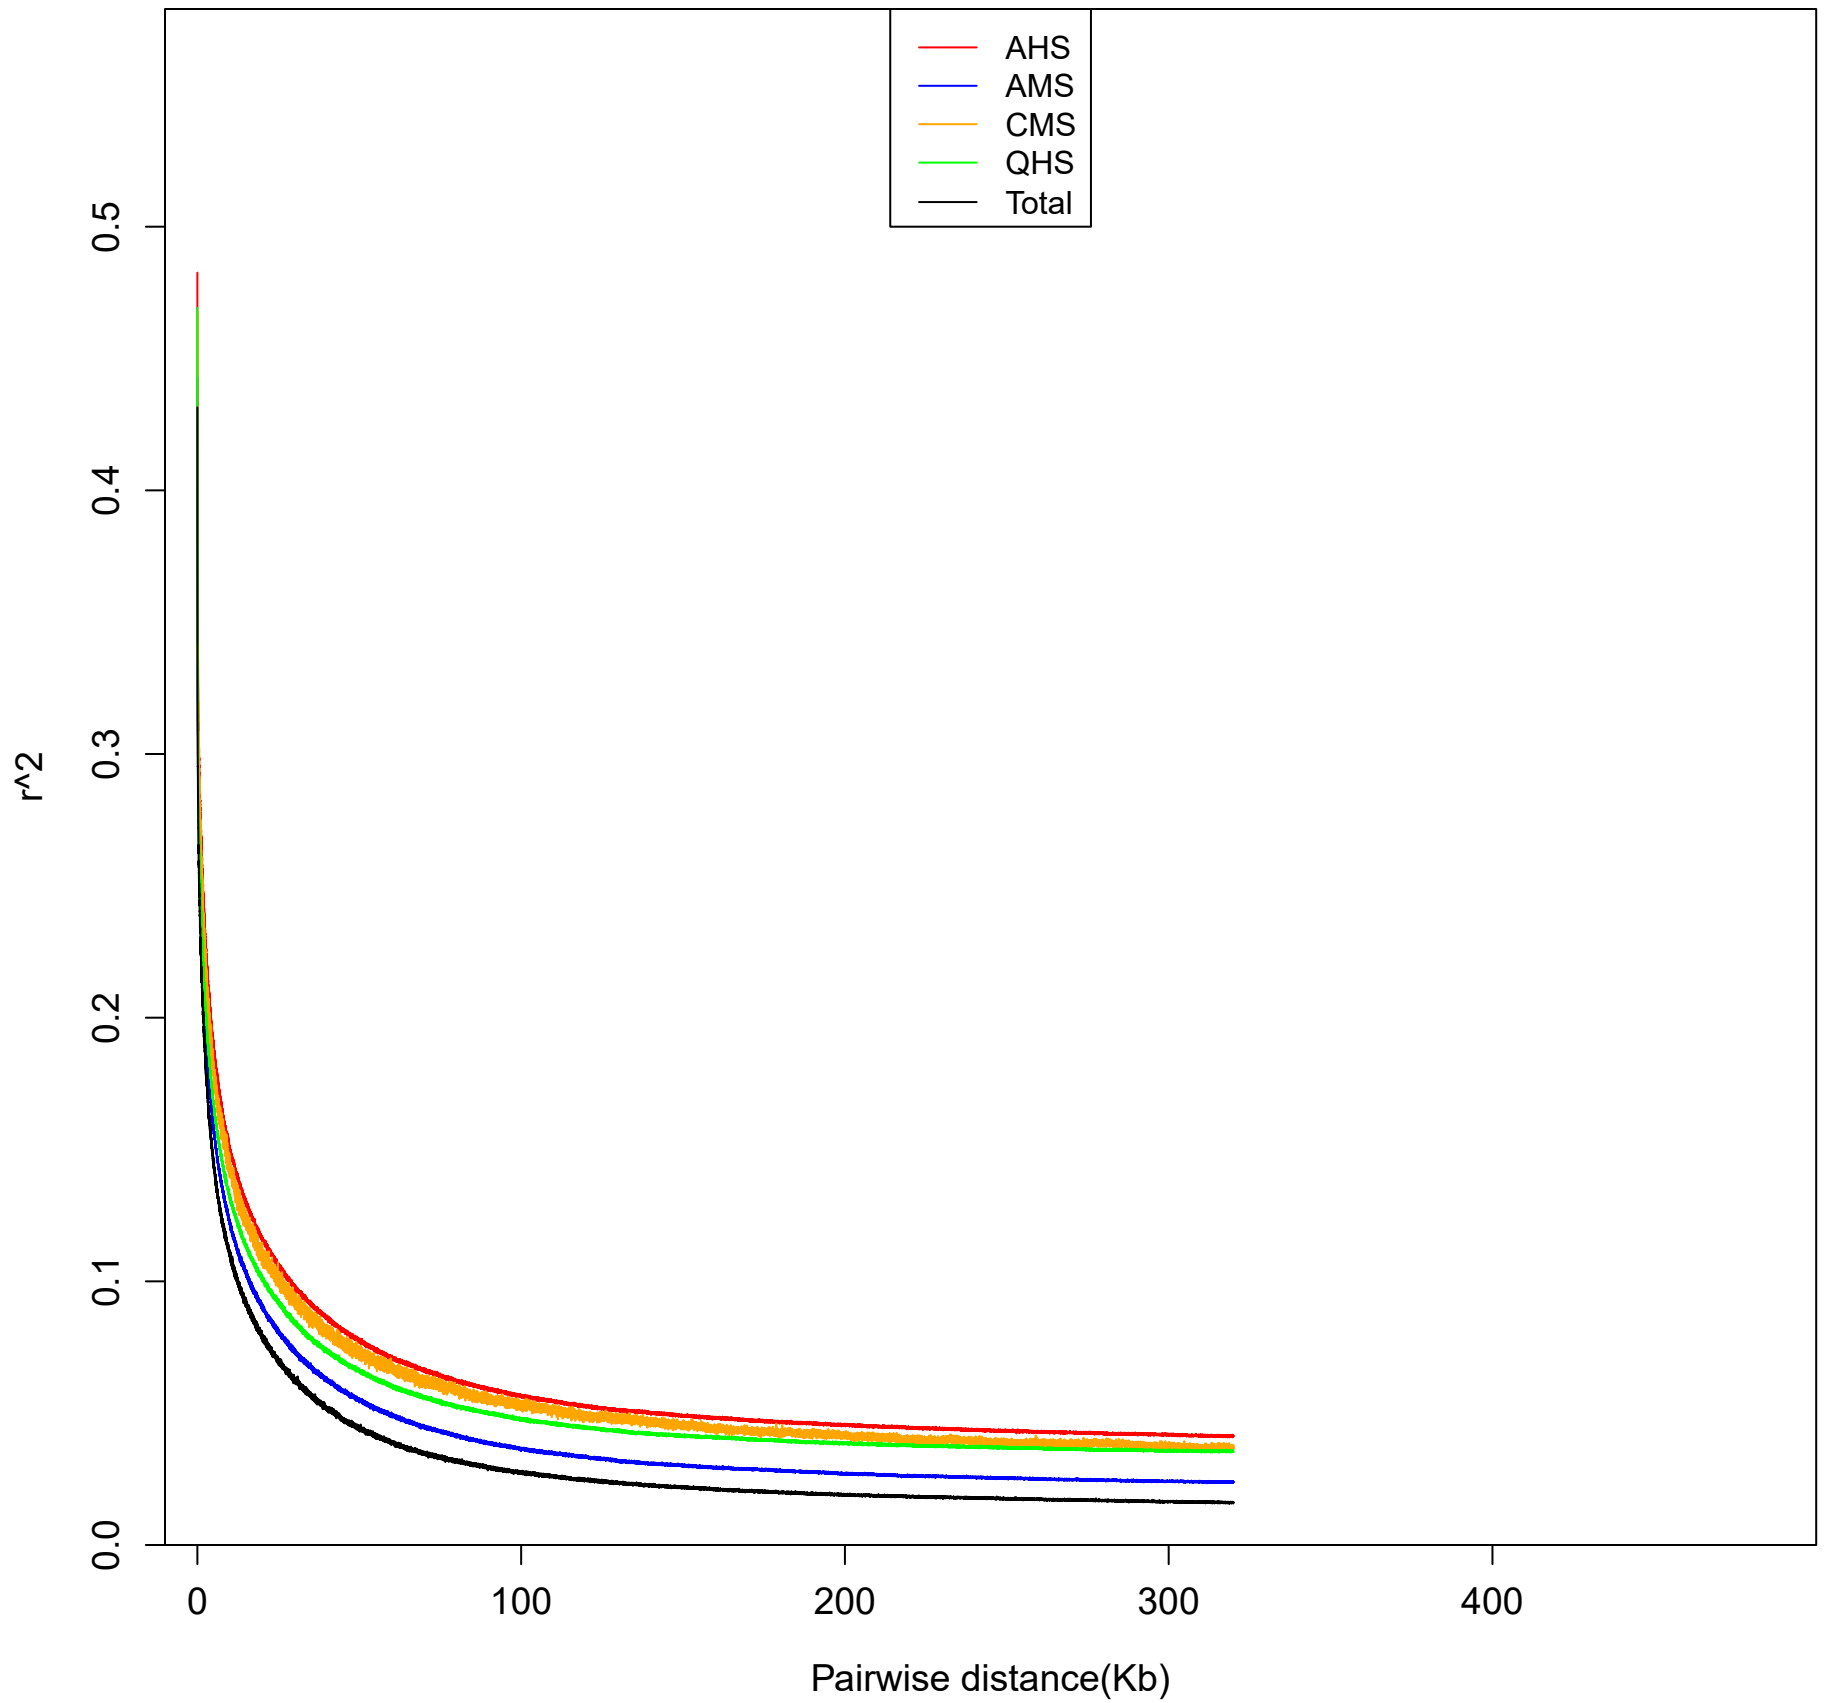

Supplement: 12864_2021_7399_MOESM8_ESM.pdf [file 12864_2021_7399_MOESM8_ESM.pdf]
